# Supplementary material for: COVID-19 Not Hypertension or Diabetes Increases the Risk of Preeclampsia among a High-Risk Population
Source: MDPI journal article supplement (doi:10.3390/ijerph192416631), 2022-12-10
Supplement: s1 [file s1]

**Table S1.** Characteristics of COVID-19 positive women admitted to the intensive care unit (ICU).

|                                             | <b>ICU Admission<br/>(n=9)</b> | <b>Non-ICU Admission<br/>(n=91)</b> | <b><i>p</i> Value</b> |
|---------------------------------------------|--------------------------------|-------------------------------------|-----------------------|
| <b>Maternal age (years)</b>                 | 27.1 ± 6.6                     | 26.78 ± 6.6                         | 0.89                  |
| <b>BMI (kg/m<sup>2</sup>)</b>               | 39.76± 10.5                    | 33.79± 8.6                          | 0.05                  |
| <b>Race/Ethnicity (n)</b>                   |                                |                                     | 0.03                  |
| <b>Black</b>                                | 6                              | 46                                  |                       |
| <b>Non-Hispanic White</b>                   | 0                              | 6                                   |                       |
| <b>Hispanic White</b>                       | 1                              | 36                                  |                       |
| <b>Other</b>                                | 2                              | 3                                   |                       |
| <b>Hypertension/Diabetes (n)</b>            |                                |                                     | 0.48                  |
| <b>No</b>                                   | 4                              | 55                                  |                       |
| <b>Yes</b>                                  | 5                              | 36                                  |                       |
| <b>Gestational age at diagnosis (weeks)</b> | 31.7 ± 3.3                     | 33.97 ± 5.87                        | 0.26                  |
| <b>Gestational age at delivery (weeks)</b>  | 34.58±4.32                     | 37.39±2.84                          | 0.008                 |
| <b>Preterm delivery (%)</b>                 |                                |                                     | 0.22                  |
| <b>No</b>                                   | 5                              | 70                                  |                       |
| <b>Yes</b>                                  | 4                              | 21                                  |                       |
| <b>Infant birthweight (g)</b>               | 2295.33± 1136.52               | 3030.88 ± 731.38                    | 0.008                 |
| <b>Infant death</b>                         |                                |                                     | 0.12                  |
| <b>No</b>                                   | 7                              | 86                                  |                       |
| <b>Yes</b>                                  | 2                              | 5                                   |                       |
| <b>NICU Admission (n)</b>                   |                                |                                     | 0.24                  |
| <b>No</b>                                   | 2                              | 50                                  |                       |
| <b>Yes</b>                                  | 5                              | 39                                  |                       |

**Table S2.** Key maternal characteristics of women with COVID-19 and descriptions surrounding infant death.

| <b>BMI (kg/m2)</b> | <b>Race</b> | <b>PreE</b> | <b>HTN/Diabetes</b> | <b>Classification</b> | <b>Description</b>                                                                                                                                                                                  |
|--------------------|-------------|-------------|---------------------|-----------------------|-----------------------------------------------------------------------------------------------------------------------------------------------------------------------------------------------------|
| 58.2               | Black       | Yes         | Yes                 | Critically Ill        | Preterm birth (33.3 weeks), maternal diabetic ketoacidosis                                                                                                                                          |
| 42.4               | Black       | Yes         | Yes                 | Severe                | Preterm birth (25.0 weeks)                                                                                                                                                                          |
| 23.7               | Black       | No          | Yes                 | Mild                  | Term birth (37.6 weeks), prenatal diagnosis of severe left sided congenital diaphragmatic hernia                                                                                                    |
| 33.7               | Black       | Yes         | Yes                 | Asymptomatic          | Preterm birth (26.3 weeks), maternal diabetic ketoacidosis                                                                                                                                          |
| 27.4               | White       | No          | Yes                 | Asymptomatic          | Term birth (40.1 weeks), prenatal diagnosis of severe left sided congenital diaphragmatic hernia                                                                                                    |
| 31                 | Black       | No          | No                  | Asymptomatic          | Term birth (37.3 weeks), mother with disseminated intravascular coagulation and category three fetal heart rate tracing. Emergent cesarean delivery for terminal bradycardia with Apgars 0/0/0/2/2. |
| 23.5               | Hispanic    | No          | No                  | Asymptomatic          | Preterm birth (33.4 weeks)                                                                                                                                                                          |
